# Supplementary material for: Annealed NaV3O8 nanowires with good cycling stability as a novel cathode for Na-ion batteries
Source: Royal Society of Chemistry journal article supplement (doi:10.1039/c3ta14486k), 2013-12-13
Supplement: c3ta14486k.pdf [file c3ta14486k.pdf]

## Annealed $\text{NaV}_3\text{O}_8$ nanowires with good cycling stability as a novel cathode for Na-ion battery

Hanna He<sup>a,†</sup>, Guanhua Jin<sup>a,†</sup>, Haiyan Wang<sup>a,\*</sup>, Xiaobing Huang<sup>b</sup>, Zehua Chen<sup>a</sup>, Dan Sun<sup>a</sup>, Yougen Tang<sup>a</sup>

<sup>a</sup>Key Laboratory of Resources Chemistry of Nonferrous Metals, Ministry of Education, School of Chemistry and Chemical Engineering, Central South University, Changsha, 410083, PR China

<sup>b</sup>College of Chemistry and Chemical Engineering, Hunan University of Arts and Science, ChangDe 415000, PR China

Tel.: +86-731-88830 886; Fax: +86-731-88879616. E-mail:wanghy419@126.com.

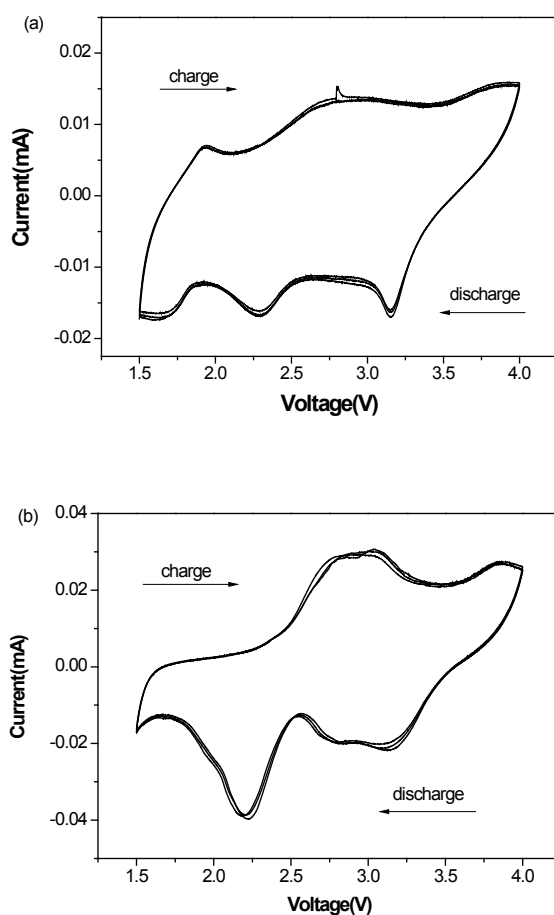

Fig. S1 CV curves of as-prepared  $\text{NaV}_3\text{O}_8 \cdot x\text{H}_2\text{O}$  electrodes after 50 cycles: (a) without heat treatment; (b) with heat treatment at 400 °C for 3 h, operating between 1.5 and 4.0 V at scanning rate  $0.1 \text{ mV s}^{-1}$ .
